# Supplementary material
Source: publisher figshare collection journal article supplement (https://geolsoc.figshare.com/ndownloader/files/22515338)
Supplement: Supplementary file 1 [file 22515338]

## Sheet: 工作表1
Spot	Isotopic ratios							Ages (Ma)							Th	U	Th/U
no.	207Pb/	1σ	207Pb/	1σ	206Pb/	1σ		207Pb/	1σ	207Pb/	1σ	206Pb/	1σ
	206Pb		235U		238U			206Pb		235U		238U
17ALS06
1	0.0527094	0.00206369	0.303912	0.0121704	0.0420166	0.000799132		316.725	116.655	269.451	9.47914	265.321	4.94589		137.213	346.966	0.395464
2	0.0541458	0.00239383	0.315884	0.014748	0.0421707	0.000648667		375.98	98.1375	278.732	11.3817	266.274	4.01495		193.337	376.755	0.513163
3	0.0532875	0.00137697	0.30092	0.00836803	0.0409748	0.000590458		342.65	59.255	267.118	6.53387	258.872	3.65918		336.001	712.46	0.471607
4	0.0516829	0.00150559	0.302226	0.00931463	0.0423066	0.00051511		272.285	66.6575	268.137	7.26517	267.114	3.18909		206.943	444.203	0.465876
5	0.0559817	0.00166452	0.325162	0.0106594	0.042099	0.000725563		450.045	66.66	285.866	8.16989	265.831	4.49062		292.317	536.71	0.544646
6	0.0562147	0.00231821	0.318011	0.014144	0.0409586	0.000849521		461.155	90.7325	280.371	10.8981	258.772	5.26274		283.392	472.807	0.599381
7	0.0535503	0.00163864	0.307069	0.0101616	0.041592	0.00065838		353.76	70.365	271.907	7.89608	262.693	4.07718		276.891	441.877	0.626624
8	0.0524859	0.00249049	0.304151	0.0146867	0.042035	0.00073908		305.615	109.243	269.638	11.4362	265.435	4.57447		167.489	335.677	0.498958
9	0.0522869	0.00124086	0.29973	0.00881765	0.0414023	0.000731253		298.21	53.6975	266.19	6.89095	261.519	4.52875		941.539	1024.21	0.919287
10	0.0559354	0.00315041	0.321782	0.0168902	0.0418552	0.000811259		450.045	124.06	283.272	12.9764	264.322	5.02164		67.8502	168.507	0.402654
11	0.0508533	0.0016171	0.29146	0.00938081	0.0414528	0.00058174		235.25	69.4325	259.708	7.37758	261.832	3.60365		148.045	350.952	0.421838
12	0.0659952	0.00363762	0.387946	0.0244291	0.0421359	0.000689243		805.555	114.808	332.868	17.8731	266.059	4.26592		431.698	691.267	0.624503
13	0.109123	0.00738601	0.695483	0.0386973	0.0463704	0.00128648		1784.88	122.995	536.09	23.1777	292.199	7.92724		69.8263	122.899	0.568162
14	0.0528856	0.00163849	0.310802	0.0101126	0.0423136	0.000620694		324.13	70.3625	274.802	7.83576	267.158	3.84153		518.062	692.93	0.74764
15	0.0653352	0.00293875	0.381904	0.0154881	0.0428707	0.00068948		784.88	94.4375	328.438	11.3824	270.603	4.26447		139.389	301.097	0.462936
16	0.0519263	0.00178808	0.305229	0.0105199	0.0424011	0.000713181		283.395	77.7675	270.476	8.18584	267.699	4.41282		326.996	582.681	0.561193
17	0.0556363	0.00349436	0.304354	0.0209183	0.0392172	0.000782004		438.935	136.097	269.795	16.285	247.979	4.85273		159.197	266.955	0.596345
18	0.0545902	0.00196267	0.315764	0.0127427	0.0415242	0.000620737		394.495	76.845	278.639	9.83541	262.274	3.8446		188.705	366.876	0.514358
19	0.0525649	0.00136894	0.307285	0.00898626	0.0422094	0.000721814		309.32	59.2525	272.074	6.98218	266.513	4.46698		282.846	706.463	0.400369
20	0.0590976	0.011406	0.333246	0.0635223	0.0406132	0.000311993		572.255	429.582	292.041	48.3782	256.633	1.93771		393.894	553.431	0.71173
21	0.0500694	0.00449111	0.293552	0.0256689	0.0424479	0.00122509		198.23	196.265	261.352	20.1498	267.989	7.57722		190.282	451.286	0.421643
22	0.0560771	0.00657809	0.290007	0.0302482	0.0387364	0.00106316		453.75	262.928	258.565	23.8095	244.996	6.59933		22.1325	38.4132	0.576169
23	0.0530257	0.0018442	0.294784	0.0108153	0.0400862	0.000570939		331.54	74.9925	262.318	8.48337	253.367	3.5413		429.41	587.355	0.731091
24	0.0533142	0.00203317	0.298045	0.0129437	0.0402642	0.000704109		342.65	89.805	264.872	10.1267	254.471	4.36546		283.341	558.56	0.507271
25	0.0554379	0.00163989	0.313857	0.0102141	0.0408637	0.000579797		431.53	66.66	277.166	7.89596	258.184	3.59358		346.433	550.013	0.629863
26	0.0528443	0.00434582	0.306341	0.0223345	0.0422219	0.000952007		320.43	187.015	271.341	17.361	266.591	5.89017		148.831	265.428	0.560719
27	0.0547358	0.00174543	0.304117	0.0100361	0.0401872	0.000591101		466.71	72.215	269.611	7.81626	253.993	3.66583		393.355	607.987	0.646979
28	0.055374	0.00246073	0.30798	0.0125056	0.0403833	0.000624763		427.825	99.99	272.614	9.70985	255.208	3.8736		375.676	525.857	0.714407
29	0.0526741	0.00226598	0.295441	0.012433	0.040729	0.000641056		322.28	98.1375	262.833	9.74676	257.35	3.97322		212.014	298.806	0.709536
30	0.0518616	0.00155022	0.292462	0.0102216	0.0407328	0.000801806		279.69	68.51	260.495	8.03225	257.373	4.96842		391.945	786.249	0.4985
17ALS08
1	0.0541124	0.00178611	0.305756	0.0115694	0.0410882	0.000970073		375.98	78.695	270.886	8.99849	259.574	6.00832		206.57	299.219	0.690363
2	0.0632841	0.00373093	0.367389	0.0222246	0.0419875	0.000774566		716.675	125.91	317.717	16.5048	265.141	4.79411		238.097	306.714	0.776282
3	0.0784756	0.00432947	0.486981	0.0332755	0.0429955	0.000700391		1158.95	104.625	402.851	22.7238	271.374	4.33137		157.36	231.471	0.679827
4	0.0517355	0.00150104	0.287782	0.00890233	0.0403879	0.00060252		272.285	66.6575	256.812	7.02143	255.237	3.73585		302.266	362.399	0.83407
5	0.0524761	0.00181601	0.293779	0.0105781	0.0406912	0.000620671		305.615	74.9925	261.53	8.30381	257.116	3.84717		213.515	269.923	0.791023
6	0.0507142	0.00140191	0.287238	0.00833153	0.0413055	0.00066549		227.845	69.4325	256.383	6.57428	260.92	4.12226		407.173	413.964	0.983595
7	0.0634152	0.00280593	0.355427	0.0148293	0.0413693	0.000840958		721.92	89.805	308.795	11.111	261.315	5.20772		152.815	201.335	0.759008
8	0.0521917	0.00231167	0.287895	0.0138587	0.0399716	0.000688772		294.505	99.985	256.901	10.9277	252.657	4.27163		121.577	204.794	0.593658
9	0.0525857	0.0023062	0.292801	0.0139328	0.040311	0.000648482		309.32	99.99	260.761	10.9445	254.761	4.02075		122.727	204.619	0.599781
10	0.0553667	0.00201233	0.307779	0.0119648	0.0404924	0.000678422		427.825	81.4725	272.458	9.29151	255.884	4.20546		149.212	228.661	0.652547
11	0.0575794	0.00219023	0.318166	0.0118446	0.0406181	0.000535724		522.26	83.3225	280.491	9.12589	256.663	3.32159		205.053	216.072	0.949003
12	0.0498835	0.0016222	0.276257	0.0103368	0.0402325	0.000705594		190.82	71.285	247.684	8.22563	254.274	4.37478		364.198	410.918	0.886303
13	0.0525539	0.00163507	0.293279	0.0100259	0.0405624	0.00058327		309.32	74.9925	261.137	7.8736	256.318	3.61608		307.87	374.427	0.822245
14	0.0561025	0.00156549	0.314	0.00931303	0.0407978	0.000720999		457.45	61.105	277.277	7.19904	257.776	4.46784		194.498	258.425	0.752627
15	0.0514448	0.00152961	0.285748	0.00881689	0.0405196	0.000546672		261.175	68.5075	255.207	6.96506	256.053	3.38966		200.822	272.666	0.736513
16	0.0511259	0.00153952	0.285205	0.00918411	0.0405993	0.000563389		255.62	73.135	254.778	7.25803	256.547	3.49289		338.859	377.644	0.897297
17	0.0524032	0.00231971	0.286581	0.013428	0.0399052	0.000867159		301.91	134.24	255.865	10.5989	252.245	5.37728		133.18	210.865	0.631586
18	0.0569111	0.00198476	0.318888	0.0130003	0.0405489	0.000769105		487.08	77.77	281.047	10.0104	256.235	4.76677		295.522	400.122	0.73858
19	0.0520455	0.00151779	0.285776	0.00878868	0.039846	0.000591093		287.1	66.66	255.229	6.94263	251.879	3.66694		353.5	444.981	0.794415
20	0.0564536	0.00576136	0.299195	0.0163816	0.038858	0.0017328		477.82	227.75	265.771	12.8043	245.751	10.7533		143.579	273.195	0.525556
21	0.0515199	0.00190854	0.287473	0.0121644	0.0402079	0.000607506		264.88	85.17	256.569	9.59519	254.121	3.76736		276.52	338.433	0.817059
Spot	Isotopic ratios							Ages (Ma)							Th	U	Th/U
no.	207Pb/	1σ	207Pb/	1σ	206Pb/	1σ		207Pb/	1σ	207Pb/	1σ	206Pb/	1σ
	206Pb		235U		238U			206Pb		235U		238U
22	0.0531901	0.00257501	0.297198	0.0138844	0.0406011	0.00064343		344.5	104.62	264.21	10.8695	256.558	3.98839		518.055	476.858	1.08639
23	0.051111	0.00186113	0.283427	0.0114029	0.0399957	0.000658756		255.62	80.5425	253.372	9.02308	252.806	4.08558		236.363	226.231	1.04478
24	0.0523352	0.00192615	0.294946	0.0116239	0.0408274	0.000655425		301.91	87.9525	262.445	9.11616	257.959	4.06179		139.208	225.712	0.616753
25	0.0549937	0.00175725	0.307942	0.0111441	0.0405783	0.000698544		413.01	72.215	272.584	8.65341	256.417	4.32972		167.242	249.815	0.669466
26	0.0544752	0.00156545	0.30242	0.00908211	0.0402786	0.000541809		390.79	64.81	268.289	7.08288	254.56	3.3603		229.646	323.938	0.708919
27	0.0534751	0.00180369	0.292198	0.00971709	0.0396708	0.000622191		350.055	49.995	260.288	7.63754	250.792	3.86024		200.63	286.753	0.699661
28	0.0535739	0.00204698	0.301489	0.0120219	0.0407606	0.000666085		353.76	87.0275	267.562	9.38088	257.546	4.12804		140.229	222.338	0.630701
29	0.0520286	0.00135555	0.292202	0.00860508	0.0406682	0.000629688		287.1	56.475	260.291	6.76399	256.973	3.90307		400.806	443.285	0.904172
30	0.0539877	0.00146698	0.30191	0.00899835	0.0405635	0.000675791		372.275	61.105	267.891	7.02034	256.325	4.1889		339.226	419.072	0.809468
17ALS10
1	0.11318	0.0107878	0.899772	0.120705	0.0559416	0.00198486		1850.93	168.055	651.606	64.5155	350.897	12.1188		165.574	347.509	0.476461
2	0.0583214	0.00163181	0.440049	0.0145985	0.0542	0.000929584		542.63	65.73	370.287	10.2965	340.256	5.68736		188.749	386.978	0.487751
3	0.080237	0.00397503	0.626373	0.0290475	0.0567726	0.000693073		1202.78	98.15	493.834	18.1382	355.968	4.23218		206.186	411.722	0.500789
4	0.0765173	0.00309019	0.601554	0.0318576	0.0554422	0.00122573		1109.26	80.715	478.22	20.2003	347.847	7.48883		779.259	1159.73	0.67193
5	0.0563483	0.00143858	0.429669	0.0120682	0.0550185	0.000740615		464.86	55.55	362.942	8.57468	345.259	4.52918		125.848	314.374	0.400312
6	0.0549384	0.00119288	0.422032	0.0112516	0.05529	0.000864365		409.31	48.1425	357.503	8.03775	346.918	5.28344		161.357	415.276	0.388553
7	0.0573359	0.00143262	0.439944	0.011561	0.0556389	0.00100266		505.595	58.3275	370.213	8.15619	349.048	6.12579		238.694	425.713	0.560692
8	0.0677116	0.00295938	0.523392	0.0249697	0.0554025	0.000883293		861.105	90.735	427.415	16.6455	347.605	5.39843		137.365	243.463	0.564212
9	0.0554464	0.00136725	0.42752	0.0109696	0.055959	0.000881403		431.53	53.6975	361.414	7.80643	351.003	5.38412		182.035	419.823	0.4336
10	0.0558896	0.00124562	0.432659	0.0108819	0.0559097	0.000708075		455.6	49.995	365.063	7.71641	350.702	4.327		182.711	424.799	0.430111
11	0.0521543	0.0017602	0.410224	0.0155825	0.0568654	0.0010867		300.06	77.7675	349.036	11.2222	356.534	6.63119		101.245	223.201	0.453604
12	0.0748818	0.00243657	0.585989	0.0221235	0.0561403	0.000926141		1064.82	65.59	468.303	14.1675	352.11	5.65613		424.727	1067.37	0.39792
13	0.0581748	0.00173813	0.451757	0.0134033	0.0562619	0.000663136		600.025	66.655	378.509	9.37806	352.852	4.05163		293.188	605.429	0.484265
14	0.056651	0.00122313	0.443972	0.0111199	0.056788	0.000798509		479.67	48.1425	373.049	7.82346	356.062	4.8747		241.525	461.694	0.523129
15	0.0536844	0.00129886	0.414361	0.0125477	0.0558024	0.000950151		366.72	55.55	352.011	9.01129	350.047	5.80441		234.568	457.064	0.513207
16	0.138223	0.015929	1.23884	0.207978	0.0577925	0.00294611		2205.24	200.77	818.356	94.3261	362.186	17.9553		344.764	637.006	0.541226
17	0.0559733	0.00119496	0.418414	0.011311	0.0541965	0.000998084		450.045	15.74	354.916	8.1007	340.235	6.10605		261.479	623.046	0.419678
18	0.0548666	0.00120852	0.415879	0.00973662	0.0550323	0.000687647		405.605	43.515	353.1	6.98664	345.343	4.20577		254.235	546.518	0.46519
19	0.0546379	0.00125889	0.418279	0.0106181	0.0554186	0.000709863		398.2	54.625	354.82	7.6056	347.703	4.33985		275.238	417.478	0.659288
20	0.0566174	0.00102739	0.428489	0.00850195	0.0549085	0.000702748		475.97	40.7375	362.103	6.04828	344.587	4.29844		373.982	767.924	0.487005
21	0.0572043	0.00170898	0.437769	0.0144492	0.0556089	0.00106618		498.19	66.66	368.678	10.2074	348.866	6.51369		129.468	246.853	0.524475
22	0.0540281	0.00118769	0.422401	0.0109393	0.0564317	0.000777929		372.275	49.995	357.766	7.81285	353.888	4.75082		310.572	560.91	0.553693
23	0.0539918	0.00131357	0.422597	0.0113661	0.0566991	0.00086271		372.275	55.55	357.907	8.11622	355.52	5.26648		170.438	384.885	0.442828
24	0.0575284	0.00192071	0.434417	0.0170238	0.0543828	0.000965369		522.26	74.065	366.308	12.0532	341.374	5.90507		118.478	347.114	0.341322
25	0.0557885	0.000992606	0.420253	0.0102265	0.0543604	0.000969269		442.64	8.3325	356.232	7.31526	341.236	5.92903		603.88	1410.88	0.428017
26	0.0579983	0.00175847	0.436867	0.01395	0.0544615	0.000724284		531.52	66.6575	368.041	9.86115	341.854	4.43173		195.347	347.815	0.56164
27	0.0561053	0.00148156	0.424803	0.0115346	0.0548099	0.000757831		457.45	62.03	359.48	8.22373	343.984	4.63517		387.8	482.468	0.803784
28	0.0524431	0.00148921	0.401595	0.0122759	0.05536	0.00075622		305.615	64.8075	342.805	8.89629	347.346	4.623		112.698	241.937	0.465817
29	0.0584948	0.00143785	0.450317	0.0122091	0.055805	0.00108592		550.035	58.3225	377.502	8.55161	350.063	6.63297		232.627	465.168	0.500094
30	0.0543368	0.00146649	0.416329	0.0120835	0.0553707	0.000901173		383.385	65.735	353.423	8.66611	347.411	5.50774		194.281	375.992	0.516715
17ALS23
1	0.0543521	0.00110482	0.40047	0.00971	0.0532695	0.000929931		387.09	46.2925	341.989	7.04388	334.563	5.6944		255.981	658.489	0.38874
2	0.282448	0.00609767	2.187	0.0619197	0.0558171	0.00101027		3376.5	33.645	1176.91	19.7439	350.137	6.17125		1740.37	1477.71	1.17775
3	0.268796	0.0210907	2.33703	0.24345	0.0575133	0.00224251		3299.07	123.455	1223.62	74.0812	360.485	13.6714		1065.62	1308.5	0.814382
4	0.0680582	0.00357139	0.504224	0.0299247	0.0530654	0.000756475		870.05	104.63	414.558	20.2018	333.314	4.63431		686.204	972.841	0.705361
5	0.135167	0.00790687	0.923247	0.0507755	0.0497268	0.000837898		2166.35	101.703	664.076	26.8109	312.844	5.14834		1058.1	1132.87	0.934002
6	0.253419	0.00507582	2.0027	0.0516004	0.0571759	0.00142328		3206.48	31.4775	1116.43	17.4655	358.428	8.681		552.561	846.564	0.652711
7	0.0532788	0.00120959	0.384936	0.0113756	0.05203	0.000878221		338.945	51.845	330.663	8.34317	326.972	5.38428		515.027	797.584	0.645733
8	0.252782	0.00704203	2.13073	0.0775399	0.0604915	0.000960153		3202.16	43.8225	1158.82	25.1607	378.614	5.84007		1158.26	1216.3	0.952284
9	0.176587	0.00554898	1.41338	0.0505163	0.0574746	0.00104952		2621.3	52.47	894.581	21.2625	360.249	6.40088		897.057	1354.1	0.662472
10	0.100374	0.00313114	0.75592	0.023441	0.0546007	0.000667676		1631.48	57.87	571.654	13.5606	342.706	4.08547		458.284	824.611	0.555758
11	0.0544482	0.00119655	0.394429	0.0114969	0.0523906	0.00113718		390.79	49.995	337.599	8.37486	329.182	6.96804		216.944	561.059	0.386669
12	0.0717753	0.00177222	0.538056	0.0148063	0.0541797	0.000863291		988.89	50.7725	437.142	9.77926	340.131	5.2823		444.971	815.097	0.545911
Spot	Isotopic ratios							Ages (Ma)							Th	U	Th/U
no.	207Pb/	1σ	207Pb/	1σ	206Pb/	1σ		207Pb/	1σ	207Pb/	1σ	206Pb/	1σ
	206Pb		235U		238U			206Pb		235U		238U
13	0.150075	0.00321522	1.13963	0.0311422	0.0547412	0.00097437		2346.61	36.73	772.335	14.7881	343.565	5.95808		866.159	1291.39	0.670718
14	0.136381	0.0102113	1.01545	0.0783392	0.0540129	0.00078926		2183.34	125.465	711.626	39.4701	339.112	4.83064		723.915	608.001	1.19065
15	0.0557668	0.00488641	0.406715	0.0295645	0.0529111	0.00179586		442.64	196.273	346.507	21.3413	332.37	10.9965		188.062	387.692	0.485082
16	0.129586	0.00485008	1.01257	0.0580555	0.0549634	0.00140775		2092.28	70.835	710.17	29.2942	344.922	8.60413		611.878	880.76	0.694717
17	0.0570139	0.00143276	0.408275	0.0126401	0.0519679	0.0012628		500.04	55.55	347.632	9.11673	326.592	7.74039		397.147	653.177	0.608024
18	0.110185	0.00713056	0.860481	0.0674249	0.054043	0.0013072		1802.16	118.362	630.385	36.8006	339.296	7.99678		513.465	906.054	0.566705
19	0.126362	0.0091283	0.927413	0.067269	0.0539969	0.000850002		2047.83	127.78	666.273	35.441	339.014	5.20197		1207.76	1469.09	0.822117
20	0.203365	0.00666405	1.5525	0.0520611	0.0554294	0.000819846		2853.39	53.395	951.49	20.72	347.769	5.01102		1231.09	1706.55	0.721394
21	0.0753546	0.00135764	0.554098	0.0153052	0.0530762	0.00113244		1079.63	35.6425	447.677	10.0044	333.38	6.93456		430.844	792.732	0.543493
22	0.137166	0.00951487	1.05542	0.0856024	0.0544027	0.000996191		2191.66	121.763	731.563	42.2908	341.495	6.09331		1041.07	1256.14	0.828785
23	0.0917839	0.00396617	0.703429	0.0375913	0.0532475	0.000953863		1462.66	77.01	540.837	22.4105	334.429	5.84093		617.391	962.264	0.641603
24	0.060068	0.00257208	0.440215	0.0210896	0.0529672	0.00141327		605.575	93.35	370.404	14.8708	332.713	8.6541		362.503	657.319	0.551487
25	0.0524231	0.00136767	0.370417	0.0110907	0.0512159	0.000996796		305.615	59.2525	319.963	8.22028	321.983	6.11517		313.992	614.828	0.5107
26	0.284038	0.00750686	2.19941	0.0710603	0.0559256	0.000975713		3387.04	41.1775	1180.86	22.5664	350.799	5.95973		1752.49	1392.2	1.2588
27	0.256733	0.010767	2.02133	0.0988952	0.0559571	0.000847942		3226.85	66.3575	1122.71	33.2446	350.992	5.17999		1486.44	1466	1.01394
28	0.126931	0.00431391	1.00131	0.0459231	0.055607	0.00117728		2057.4	59.875	704.477	23.3044	348.854	7.19193		469.904	808.632	0.581109
29	0.0565028	0.00123308	0.409581	0.0107344	0.0523486	0.000681974		472.265	43.515	348.573	7.73607	328.924	4.18137		272.388	565.975	0.481273
30	0.067312	0.00194788	0.496035	0.0186807	0.0525586	0.000725247		855.55	59.2575	409.015	12.6819	330.211	4.44537		599.938	863.091	0.695104
31	0.0856236	0.0030165	0.642456	0.0301954	0.0527718	0.00103101		1331.48	68.5225	503.826	18.6702	331.516	6.31568		360.079	824.414	0.436769
32	0.0774776	0.00335431	0.599204	0.0377053	0.0532441	0.0011373		1144.45	81.015	476.729	23.9424	334.408	6.96321		425.193	765.955	0.555115
17ALS29
1	0.0549476	0.00119781	0.321766	0.00833361	0.0425388	0.00081733		409.31	48.1425	283.26	6.40479	268.55	5.05594		1043.23	824.836	1.26477
2	0.0553556	0.00181305	0.324969	0.01165	0.0425957	0.000637604		427.825	74.0675	285.718	8.93005	268.902	3.94501		123.044	197.156	0.624094
3	0.0495307	0.00167313	0.295314	0.0130921	0.0430418	0.00115739		172.305	74.9875	262.734	10.2644	271.66	7.15462		191.682	461.186	0.415629
4	0.0529633	0.00323198	0.327235	0.0175547	0.0450042	0.000667208		327.835	136.093	287.453	13.4314	283.777	4.11872		257.116	275.836	0.932134
5	0.0531797	0.00127586	0.327651	0.00930935	0.0444925	0.000617423		344.5	55.55	287.771	7.12245	280.62	3.81363		375.343	381.932	0.982748
6	0.0567686	0.00151796	0.337959	0.00989278	0.0431261	0.000597049		483.375	52.7725	295.624	7.51037	272.181	3.69263		144.851	228.088	0.635065
7	0.0590305	0.00452636	0.325037	0.0223329	0.0402852	0.000802242		568.55	168.498	285.769	17.1149	254.6	4.97322		121.617	185.387	0.656018
8	0.0516829	0.00146345	0.296452	0.00906349	0.0416129	0.000600693		272.285	69.435	263.626	7.1008	262.823	3.72032		231.748	290.27	0.798386
9	0.0559358	0.00679175	0.321258	0.0174594	0.0418545	0.00289263		450.045	272.185	282.87	13.4189	264.318	17.8986		90.5378	155.203	0.583351
10	0.0511672	0.00125065	0.304222	0.00794096	0.0430637	0.000519107		255.62	55.545	269.693	6.18504	271.796	3.21158		384.367	366.672	1.04826
11	0.0540277	0.0016903	0.312556	0.0100187	0.041993	0.000553237		372.275	70.365	276.16	7.75264	265.175	3.42566		155.385	228.755	0.679262
12	0.0659543	0.0130089	0.343738	0.0674073	0.0376644	0.000419006		805.555	422.195	300	50.9361	238.34	2.60622		140.134	170.198	0.823362
13	0.0526242	0.00170284	0.315832	0.0114893	0.0432523	0.000543306		322.28	72.215	278.691	8.86795	272.961	3.36041		178.795	288.198	0.620389
14	0.053601	0.00152077	0.319075	0.0100575	0.0429889	0.000587409		353.76	64.8075	281.191	7.74428	271.333	3.63356		260.435	310.476	0.838826
15	0.0528861	0.00202984	0.328854	0.0122352	0.0450629	0.000626086		324.13	87.03	288.69	9.351	284.139	3.86503		382.928	389.015	0.984351
16	0.0570049	0.00230943	0.344566	0.0148183	0.0438631	0.000708428		500.04	95.3575	300.626	11.1923	276.734	4.37747		64.5438	99.5438	0.648396
17	0.0536775	0.00190663	0.318392	0.0135177	0.042583	0.000756309		366.72	79.62	280.665	10.4126	268.824	4.6786		98.0095	146.48	0.669099
18	0.0507356	0.00115907	0.296822	0.00708739	0.0423542	0.00045201		227.845	51.84	263.915	5.55217	267.409	2.79917		269.522	376.363	0.716123
19	0.0501485	0.0017406	0.283549	0.0100336	0.0409521	0.000470078		211.185	79.615	253.469	7.9392	258.732	2.91445		481.607	432.913	1.11248
20	0.0558002	0.00758681	0.299007	0.0393237	0.038908	0.0012407		442.64	305.515	265.624	30.7384	246.061	7.69968		86.0525	142.772	0.602726
21	0.0526289	0.0016519	0.307406	0.00988061	0.0424413	0.000611657		322.28	72.215	272.168	7.6759	267.948	3.78523		183.521	234.33	0.783174
22	0.0578261	0.0082495	0.295853	0.03815	0.0374977	0.00123239		524.11	316.625	263.156	29.8935	237.304	7.6584		54.2701	121.279	0.44748
23	0.0525093	0.00157815	0.311557	0.0111082	0.0430468	0.0010682		309.32	68.5125	275.387	8.60177	271.691	6.60349		979.356	1146.69	0.854074
24	0.0525732	0.00156498	0.297336	0.00961377	0.0411863	0.000650028		309.32	66.66	264.318	7.52653	260.182	4.02705		255.996	353.901	0.723355
25	0.0522756	0.00204228	0.300916	0.0130228	0.0415653	0.000601407		298.21	88.8775	267.116	10.1661	262.528	3.7249		120.684	189.309	0.637497
26	0.0578099	0.00183485	0.330225	0.00943908	0.0415527	0.000581775		524.11	70.3625	289.738	7.2077	262.45	3.60353		1764.29	1123.11	1.57089
27	0.0535532	0.0018877	0.313137	0.0129736	0.0419826	0.000599812		353.76	49.07	276.61	10.0336	265.11	3.71361		286.058	294.939	0.969889
28	0.0492425	0.00164681	0.298113	0.0109055	0.0441396	0.000838321		166.75	77.765	264.925	8.53218	278.441	5.17789		238.754	268.061	0.89067
29	0.232951	0.011888	1.70794	0.125142	0.0500804	0.00123617		3072.53	81.485	1011.51	46.9288	315.015	7.5907		205.131	281.574	0.728517
30	0.0554124	0.00134454	0.312362	0.00832952	0.0408072	0.000569588		427.825	55.55	276.01	6.44734	257.835	3.53058		356.272	496.068	0.718191
31	0.0533412	0.0012928	0.315937	0.00889565	0.0427449	0.000673287		342.65	55.55	278.772	6.86654	269.825	4.16492		1115.64	757.277	1.47323
32	0.0516873	0.00184363	0.289891	0.0107555	0.0404737	0.000645871		272.285	81.4675	258.474	8.46837	255.768	4.00397		1035.47	670.642	1.54399
Spot	Isotopic ratios							Ages (Ma)							Th	U	Th/U
no.	207Pb/	1σ	207Pb/	1σ	206Pb/	1σ		207Pb/	1σ	207Pb/	1σ	206Pb/	1σ
	206Pb		235U		238U			206Pb		235U		238U
17ALS35
1	0.0527467	0.00140882	0.296805	0.0104605	0.0406303	0.000849731		316.725	59.255	263.902	8.19242	256.739	5.26567		644.815	436.935	1.47577
2	0.052335	0.00158919	0.287879	0.00893669	0.0399552	0.000444801		301.91	70.3625	256.889	7.04798	252.555	2.76057		444.643	307.734	1.44489
3	0.0506867	0.00759435	0.291423	0.0548017	0.0410344	0.00181845		233.4	305.525	259.679	43.0883	259.241	11.2613		123.25	123.819	0.995405
4	0.050048	0.00135049	0.285745	0.00819289	0.0414827	0.000482876		198.23	62.95	255.205	6.47245	262.017	2.99218		393.701	349.847	1.12535
5	0.0512061	0.00472056	0.292415	0.0285858	0.0412725	0.000829812		250.065	208.308	260.458	22.459	260.715	5.13921		74.8465	77.7263	0.962949
6	0.0504178	0.00476925	0.281024	0.0276298	0.0403712	0.00115256		213.035	207.385	251.47	21.901	255.134	7.14291		216.272	160.581	1.34681
7	0.0510138	0.00207797	0.285762	0.0125782	0.0408114	0.00071004		242.66	92.58	255.218	9.93467	257.86	4.39994		149.083	127.644	1.16796
8	0.0502525	0.00147022	0.284	0.00889045	0.0411734	0.000607705		205.63	36.105	253.826	7.03266	260.102	3.76522		417.762	405.722	1.02967
9	0.0525058	0.00120848	0.290163	0.00835861	0.0400593	0.000622906		309.32	56.475	258.688	6.58074	253.2	3.86327		704.759	375.666	1.87603
10	0.050212	0.00136602	0.285887	0.00867729	0.0413468	0.000541576		205.63	97.2075	255.316	6.85411	261.176	3.35557		1033.6	732.344	1.41136
11	0.0521968	0.0042006	0.294673	0.0290897	0.0403667	0.00076397		294.505	189.79	262.231	22.8151	255.105	4.73578		437.708	255.212	1.71507
12	0.0521415	0.00109209	0.293725	0.00715631	0.0408574	0.000496863		300.06	48.1425	261.487	5.61946	258.145	3.08041		579.728	394.893	1.46806
13	0.0520188	0.00164934	0.288562	0.00969808	0.0402807	0.000464134		287.1	76.8425	257.427	7.64406	254.573	2.87943		437.496	305.859	1.43038
14	0.0512997	0.00230157	0.288176	0.0138112	0.0406832	0.000504968		253.77	103.69	257.123	10.8879	257.067	3.13105		206.273	215.235	0.958358
15	0.051773	0.00112931	0.29131	0.00692661	0.0407952	0.000429501		275.99	45.365	259.59	5.44939	257.76	2.66385		893.699	555.692	1.60826
16	0.052854	0.0019636	0.295302	0.0112299	0.0406124	0.000545223		324.13	85.1775	262.724	8.80488	256.628	3.3804		220.211	192.147	1.14605
17	0.0522982	0.00156696	0.289774	0.00918253	0.040208	0.000496576		298.21	68.5125	258.381	7.23114	254.122	3.08046		365.976	279.222	1.3107
18	0.0537112	0.00170096	0.294678	0.00972039	0.0398008	0.000457985		366.72	70.3625	262.235	7.62554	251.598	2.8426		622.993	319.383	1.95062
19	0.0496219	0.00250813	0.282888	0.0158747	0.0411433	0.000803453		176.01	123.13	252.946	12.5657	259.916	4.9767		378.235	401.139	0.942902
20	0.0524067	0.00123344	0.292268	0.00739688	0.0404101	0.00048834		301.91	55.55	260.343	5.8147	255.374	3.02891		437.384	373.735	1.17031
21	0.0518386	0.0013076	0.290192	0.00777123	0.0405834	0.000481678		279.69	62.03	258.71	6.1185	256.448	2.9872		366.859	326.621	1.12319
22	0.0533119	0.00100041	0.293374	0.00768345	0.0397052	0.000705901		342.65	42.5875	261.212	6.03463	251.005	4.37885		1957.21	845.856	2.31388
23	0.0525809	0.00142101	0.29726	0.00932719	0.0407928	0.000637657		309.32	58.3275	264.258	7.30273	257.745	3.95194		673.417	437.244	1.54014
24	0.0531328	0.00127121	0.297382	0.00817597	0.0403444	0.000549497		344.5	53.7	264.353	6.40136	254.968	3.4077		845.506	526.461	1.60602
25	0.0507165	0.00222091	0.287007	0.0132018	0.0410221	0.000732685		227.845	101.838	256.201	10.417	259.166	4.53923		134.371	135.109	0.994537
26	0.0520439	0.00151848	0.290914	0.00847806	0.0407273	0.000562027		287.1	66.66	259.278	6.67084	257.339	3.48405		216.452	235.238	0.920139
27	0.0536386	0.00160592	0.303185	0.00965468	0.0408867	0.000582767		366.72	66.66	268.885	7.52471	258.327	3.61189		433.035	296.289	1.46153
28	0.0514751	0.00151174	0.28568	0.00823447	0.0403756	0.000433088		261.175	66.655	255.153	6.5056	255.161	2.68705		346.245	259.234	1.33565
29	0.052883	0.0012612	0.292404	0.00769466	0.0400251	0.000521438		324.13	21.295	260.449	6.04794	252.988	3.23493		642.049	392.685	1.63502
30	0.0517216	0.00192451	0.297014	0.0115861	0.0417431	0.000642359		272.285	89.8	264.065	9.07207	263.629	3.97753		201.33	187.117	1.07596
31	0.0496806	0.00112668	0.280821	0.00667463	0.041101	0.000547441		188.97	51.8425	251.308	5.29413	259.654	3.39261		652.886	475.03	1.37441
32	0.0522263	0.00134612	0.294574	0.00869427	0.0409379	0.000664448		294.505	59.255	262.153	6.82157	258.644	4.11722		884.712	392.535	2.25384
17ALS45
1	0.0987826	0.00236361	1.44649	0.0323827	0.106123	0.00280653		2000	44.44	908.416	13.4542	650.191	16.3601		474.229	1248.53	0.379828
2	0.0518053	0.00312708	0.273457	0.0158536	0.0385742	0.000740795		275.99	138.87	245.454	12.6419	243.989	4.59999		104.664	142.559	0.734179
3	0.0523583	0.00147367	0.284301	0.00827024	0.0393711	0.000583575		301.91	64.81	254.064	6.54083	248.934	3.62196		159.682	337.925	0.472537
4	0.0545744	0.00156107	0.297409	0.00890224	0.039537	0.000578868		394.495	64.8075	264.375	6.96942	249.962	3.59224		232.288	426.741	0.544329
5	0.0499269	0.00171459	0.273525	0.0102358	0.0396014	0.000520083		190.82	112.02	245.508	8.1627	250.362	3.22779		160.326	295.169	0.543167
6	0.0554031	0.00127743	0.304226	0.00784004	0.0397379	0.000456651		427.825	51.845	269.696	6.10648	251.208	2.8345		512.937	553.208	0.927205
7	0.0538759	0.00148575	0.29743	0.00845357	0.040171	0.000522673		364.87	62.9575	264.391	6.6183	253.893	3.24215		172.906	355.368	0.486554
8	0.0518102	0.00215783	0.290449	0.0138378	0.040524	0.000746777		275.99	89.8	258.913	10.8897	256.08	4.62861		140.318	228.138	0.615057
9	0.0626149	0.00272388	0.335732	0.0150886	0.0389769	0.000592093		694.455	94.435	293.933	11.4716	246.488	3.6761		114.278	149.77	0.763019
10	0.0573915	0.0029587	0.310452	0.0153225	0.0396176	0.000594058		505.595	112.948	274.531	11.8739	250.462	3.68609		122.216	126.252	0.968032
11	0.0534947	0.00139282	0.295298	0.0101538	0.0398855	0.000846465		350.055	54.625	262.721	7.96153	252.123	5.24913		278.242	591.061	0.470751
12	0.142547	0.00961547	0.81064	0.0679493	0.0397881	0.000940211		2258.34	115.588	602.813	38.1073	251.52	5.83064		185.148	235.544	0.786044
13	0.0559684	0.00317624	0.298933	0.0180635	0.0384305	0.00053885		450.045	125.912	265.566	14.1215	243.097	3.34767		144.976	244.186	0.593711
14	0.0514809	0.00164933	0.27921	0.00922264	0.0394323	0.000546699		261.175	78.69	250.031	7.32251	249.313	3.39322		156.597	207.171	0.755883
15	0.0987816	0.00688686	0.612142	0.0545195	0.0417624	0.000771182		2000	131.322	484.91	34.3399	263.748	4.77419		206.394	310.065	0.665648
16	0.0560449	0.00315011	0.306377	0.0185057	0.0394042	0.000756062		453.75	125.915	271.369	14.3848	249.139	4.69105		33.7404	97.8044	0.344979
17	0.0514569	0.00348137	0.28174	0.0179614	0.039755	0.000739043		261.175	155.535	252.037	14.2299	251.314	4.58403		28.2745	71.7241	0.394213
18	0.0982253	0.00488739	0.583924	0.0309226	0.0428241	0.000805191		1590.74	93.21	466.98	19.8256	270.314	4.97958		139.727	202.101	0.691373
19	0.0537761	0.0107487	0.307622	0.0794448	0.0394771	0.00258507		361.165	397.785	272.336	61.6901	249.591	16.0321		140.156	195.997	0.715095
Spot	Isotopic ratios							Ages (Ma)							Th	U	Th/U
no.	207Pb/	1σ	207Pb/	1σ	206Pb/	1σ		207Pb/	1σ	207Pb/	1σ	206Pb/	1σ
	206Pb		235U		238U			206Pb		235U		238U
20	0.0517133	0.00754705	0.297632	0.0448014	0.0416482	0.00197521		272.285	303.675	264.549	35.057	263.041	12.2247		196.377	358.192	0.548247
21	0.186207	0.0210196	1.02578	0.134455	0.0392406	0.0014166		2708.95	187.343	716.814	67.3949	248.124	8.78823		239.544	370.977	0.645711
22	0.0561861	0.00258392	0.30989	0.0139536	0.0404667	0.000710407		461.155	106.47	274.096	10.818	255.725	4.40363		82.4016	127.362	0.646987
23	0.0559089	0.00156179	0.298731	0.00832172	0.0390509	0.000537622		450.045	61.105	265.408	6.50865	246.948	3.33815		464.543	489.85	0.948338
24	0.0536865	0.00167702	0.296744	0.011064	0.0399707	0.000591279		366.72	70.3625	263.854	8.66524	252.651	3.66767		184.436	308.766	0.59733
25	0.05691	0.00503706	0.288678	0.0258342	0.036826	0.000670909		487.08	196.273	257.518	20.3562	233.129	4.17324		251.609	389.688	0.645669
26	0.059751	0.00202107	0.327862	0.0120147	0.0398332	0.000489013		594.47	72.21	287.932	9.18941	251.799	3.03467		227.499	417.364	0.545087
27	0.0486543	0.00131602	0.27651	0.00797559	0.0413811	0.000521395		131.57	64.8075	247.886	6.34632	261.388	3.23065		209.8	391.849	0.535409
28	0.0549285	0.0022051	0.305367	0.0131393	0.04028	0.000694399		409.31	90.7325	270.583	10.2221	254.568	4.30525		117.565	162.725	0.722475
29	0.0526615	0.00581286	0.270594	0.0302472	0.0372963	0.00115264		322.28	251.82	243.169	24.1723	236.052	7.16436		55.298	130.426	0.423981
30	0.0486414	0.00183076	0.263947	0.0107922	0.0394652	0.00067882		131.57	88.8775	237.843	8.67134	249.517	4.21197		186.388	205.427	0.907321
31	0.0501421	0.00225865	0.271167	0.013023	0.0392863	0.000731526		211.185	100.91	243.626	10.4038	248.407	4.53944		85.9221	181.645	0.473022
32	0.0598523	0.00195706	0.318417	0.0104235	0.0391174	0.000676346		598.17	104.615	280.684	8.02993	247.36	4.198		112.65	199.633	0.564284
33	0.0513414	0.00216396	0.281108	0.0121648	0.0398219	0.000734831		257.47	91.6525	251.536	9.6431	251.729	4.55764		117.294	161.953	0.724247
34	0.0477319	0.00171049	0.265399	0.009407	0.0404516	0.000503848		87.13	81.47	239.008	7.55013	255.631	3.12478		237.463	346.784	0.68476
35	0.0583307	0.00274954	0.319933	0.0156058	0.04003	0.000880651		542.63	103.69	281.851	12.0066	253.019	5.46025		130.032	180.592	0.720029
36	0.0540993	0.00245513	0.295522	0.0142286	0.0394628	0.00074414		375.98	71.29	262.897	11.1533	249.502	4.61688		90.2918	138.901	0.650045
37	0.0571634	0.00383357	0.299099	0.019024	0.037892	0.000782716		498.19	148.127	265.696	14.8704	239.753	4.86322		375.794	436.423	0.861078
38	0.0595274	0.00223184	0.318056	0.012943	0.0386703	0.000581355		587.065	81.47	280.406	9.97261	244.585	3.61054		189.359	308.465	0.613874
39	0.0549086	0.00220957	0.293858	0.0142307	0.0383819	0.000683188		409.31	88.88	261.591	11.1693	242.796	4.24335		148.548	240.21	0.618406
40	0.0444884	0.00214411	0.250081	0.0128389	0.0406732	0.000703755		error		226.642	10.4296	257.004	4.3616		118.582	150.797	0.786373
17ALS51
1	0.07392	0.00257499	0.57926	0.0214651	0.057336	0.0012617		1038.89	70.3725	463.986	13.8045	359.404	7.69484		108.31	461.011	0.234939
2	0.061116	0.00405155	0.480888	0.0421597	0.0553365	0.000898735		642.61	147.202	398.682	28.9084	347.202	5.49303		47.9089	122.749	0.3903
3	0.0678399	0.00363123	0.505598	0.0257028	0.0544603	0.00100632		864.81	111.11	415.485	17.3364	341.847	6.15489		94.3875	219.792	0.42944
4	0.0546447	0.00318677	0.414257	0.0221199	0.0552694	0.0011036		398.2	131.468	351.936	15.883	346.792	6.74425		81.1484	206.893	0.392223
5	0.0566053	0.00218173	0.431154	0.0166255	0.0553571	0.00090362		475.97	89.805	363.996	11.7982	347.328	5.52275		43.6673	111.022	0.393322
6	0.0535763	0.00131375	0.403799	0.0111393	0.0544876	0.000797765		353.76	55.55	344.399	8.06055	342.014	4.88048		171.373	331.696	0.516659
7	0.0580749	0.0013948	0.436498	0.0157882	0.0541065	0.0013601		531.52	51.845	367.78	11.1626	339.684	8.31972		236.2	804.006	0.293779
8	0.0543206	0.00170841	0.420293	0.0139379	0.0560625	0.000876012		383.385	65.735	356.26	9.96731	351.635	5.35072		49.066	310.241	0.158155
9	0.0639214	0.00219585	0.498092	0.0198533	0.0559109	0.000976808		738.895	72.215	410.41	13.4591	350.709	5.96649		322.486	510.541	0.631656
10	0.0650154	0.00173085	0.494459	0.0200116	0.0549629	0.00213323		775.93	57.4025	407.944	13.5993	344.919	13.0366		240.765	843.419	0.285463
11	0.0600496	0.00136985	0.444559	0.0107048	0.053669	0.000790345		605.575	49.99	373.462	7.5287	337.008	4.83881		443.323	1060.1	0.41819
12	0.0553865	0.00142756	0.534693	0.0166157	0.0694805	0.00123055		427.825	57.4025	434.92	10.9973	433.025	7.42095		145.719	415.557	0.350659
13	0.0665958	0.00261556	0.510987	0.0196986	0.0554276	0.000893356		833.33	81.4775	419.112	13.2405	347.759	5.45973		193.524	464.669	0.416478
14	0.0819919	0.00677814	0.625928	0.0567422	0.0544749	0.000973476		1255.55	161.572	493.556	35.4368	341.937	5.9541		34.1231	100.727	0.338766
15	0.0676404	0.00155758	0.517837	0.0138313	0.0553178	0.000849838		857.4	48.1475	423.705	9.25717	347.088	5.19462		546.416	957.553	0.570638
16	0.0526793	0.00146561	0.395525	0.0119982	0.054281	0.000884593		322.28	62.9575	338.398	8.73294	340.751	5.41198		167.069	621.444	0.26884
17	0.0630011	0.00229802	0.496959	0.0502479	0.0554721	0.00381082		709.27	77.77	409.642	34.0842	348.03	23.2757		269.664	970.362	0.277901
18	0.0744539	0.00278691	0.567029	0.0219137	0.055286	0.00140578		1053.71	75.9275	456.092	14.2027	346.893	8.5895		80.1538	248.421	0.322653
19	0.0557691	0.00155613	0.413571	0.0120507	0.0535909	0.000696089		442.64	58.3275	351.444	8.65942	336.53	4.26291		189.928	442.658	0.429063
20	0.0608287	0.00128891	0.455293	0.0112247	0.05387	0.000699287		631.5	46.2875	380.979	7.83593	338.238	4.28136		338.827	1281.65	0.264367
21	0.06309	0.00178847	0.483179	0.015931	0.0552286	0.00115493		722.23	61.105	400.251	10.9097	346.542	7.05798		257.458	703.624	0.365903
22	0.0534147	0.00126733	0.394898	0.0121847	0.053142	0.000969312		346.35	49.07	337.941	8.87254	333.783	5.93602		224.357	747.261	0.300239
23	0.0506628	0.00220642	0.37747	0.0160806	0.054103	0.000876867		233.4	101.835	325.175	11.8556	339.662	5.36566		45.8246	142.728	0.321062
24	0.0565676	0.00183091	0.429968	0.0144506	0.0548962	0.00108531		475.97	39.81	363.154	10.264	344.512	6.63486		257.015	622.779	0.41269
25	0.0547922	0.00166877	0.421208	0.0150207	0.0554193	0.00105989		466.71	66.66	356.914	10.7343	347.708	6.47647		132.849	365.318	0.363654
26	0.0665457	0.00128365	1.05985	0.0265767	0.1153	0.0020646		833.33	40.7375	733.752	13.1102	703.453	11.9394		168.915	505.492	0.33416
27	0.0715086	0.00176499	1.13552	0.0391425	0.113885	0.00232801		972.225	50.4625	770.379	18.6186	695.271	13.4782		86.7415	468.114	0.1853
28	0.0557314	0.00229601	0.419534	0.018873	0.0543268	0.00085106		442.64	92.585	355.718	13.5019	341.031	5.20685		99.9717	257.832	0.38774
29	0.117876	0.00207983	5.08806	0.105569	0.312835	0.00415331		1924.38	31.485	1834.12	17.6512	1754.64	20.416		63.8333	163.052	0.39149
30	0.0666698	0.00500316	0.498938	0.0401303	0.0539527	0.00119744		827.775	157.403	410.983	27.1858	338.743	7.32633		50.5933	146.021	0.346481
